# Supplementary material for: Barriers and Facilitating Factors to Healthcare Accessibility among Nepalese Migrants during COVID-19 Crisis in Japan: An Exploratory Sequential Mixed Methods Study
Source: Research Square preprint supplement (doi:10.21203/rs.3.rs-2633701/v1), 2023-03-16
Supplement: Supplementary file 2 [file 2d67b8430283d6e5062f4d06.xlsx]

## Sheet: Sheet1
Table 2. Joint display of qualitative themes with quantitative findings of the survey items (N=937)
Category	Themes	Representative sentences	Corresponding survey items	Proportion of agreed	Crude OR (95% CI)	Adjusted OR (95% CI)
Financial barriers	Lack of knowledge of health insurance	“I was scared to visit a hospital because I thought the health care cost in Japan is too expensive. When my symptoms got worse, I had a checkup. I was surprised to see that my bill was less expensive than I expected it to be” (FN-1a)	FN1a. I think healthcare costs are expensive in Japan.	0.583	0.54 (0.41 - 0.70) ***	0.55 (0.42 - 0.74) ***
		“In Nepal, I had no insurance. I did not know the benefits of having health insurance” (FN-1b)	FN1b. I didn’t/don’t know the benefits of having health insurance.	0.354
		“I have chronic lung disease. I have been taking medicines from Nepal. During my stay in Japan, I have realized that it is much easier to get treatment if I say I have symptoms, and I have to onegai (request) a lot if I have no symptoms” (FN-1c)	FN1c. It is difficult to get treatment if there are no symptoms in the body.	0.561
		“Health insurance is a waste of money because I have never used health services” (FN-1d)	FN1d. Insurance is a waste of money.	0.228
	lack of knowedge on the health care service utilization cost	“There were some services which were covered by health insurance, and some were not covered by health insurance. So, I worried what if my bills were too high” (FN-5a)	FN2. Even with insurance, it is difficult to decide what care is affordable and what is not because the price is unknown.	0.669	1.04 (0.79 - 1.37)	1.13 (0.84 - 1.51)
		“I did not know how much we needed to pay for healthcare even if I had health insurance. It was difficult to decide which care was affordable and which was not because the price of the care and service provided was not known. I wondered what if medicines were expensive or my CT scanning was expensive, it was scary to me as I had limited budgets” (FN-5b)
Structural barriers	Perceived denial of care	“I was having difficulty in breathing and my blood oxygen saturation was dropping. I called the public health center many times, but I was being repeatedly denied that I was not sick enough to get hospitalized. Later, I pretended to be unconscious and asked my friend to speak on behalf of me, consequently, I got admitted” (S-1a)	S1. Hospital/ clinic/ public health centers denied providing healthcare services.	0.231	0.86 (0.64 - 1.18)	0.92 (0.65 - 1.28)
		“My health condition was not good. I called hokenjyo (public health center). They told me to do gaman (patience) and said matte (to wait). Then I called a health clinic nearby. They told me that this was a COVID-19 case and they could not accept me. They told me to call hokenjo (public health center) again” (S-1b)
		“After vaccination, I had a high-grade fever. I was taking medicines at home, but my fever was not subsiding. After 3 days, I went to the hospital, however, the hospital refused to admit me. I was told that admission was unnecessary despite my unwellness” (S-1c)
	Perceived delay in care	“It took two days for the health center to provide me medicines for fever” (S-2a)	S2. The healthcare service was late.	0.23	0.63 (0.46 - 0.87) **	0.63 (0.45 - 0.89) **
		“I had to call the public health center so many times. After a week healthcare providers came to my house” (S-2b)
		“It was difficult to call the health center. The line was too busy. I could not make it. So, I called a Nepali nurse in Japan and took drug stores medicines that she recommended” (S-2c)
	Limited operating hours of hospitals	“We took our friend with a mental health emergency to hospital, but they told us to come tomorrow as the operating hour was already over for the day. We could not find other hospitals either. We waited until the next morning” (S-3)	S3. Limited opening hours of the hospitals delayed emergency care.	0.353	0.65 (0.50 - 0.86) **	0.60 (0.45 - 0.81) **
	Temporary disruption in healthcare services	“Fever medicines were not available at drugstores” (S-4a)	S4. Hospital beds/ Ambulance/were Medicines for COVID-19 were not available.	0.201	0.81 (0.59 - 1.12)	0.80 (0.56 - 1.14)
		“Hospital beds were not available. I got treatment inside ambulance” (S-4b)
		“I tried to call ambulances, but they were not available” (S-4c)
	Perceived complexity in vaccine registrations	“Vaccines were not available. I tried to register my name for the vaccine but each time the person on the phone said sumimasen (sorry), there were no vacancy centers. I got COVID-19 infection later” (S-5a)	S5. It is/was difficult to make a reservation for vaccination.	0.333	0.63 (0.48 - 0.84) **	0.60 (0.44 - 0.82) **
		“I tried calling so many times but the call was not accessible” (S-5b)
		“I had to call every week to ensure that I would get registered. It was then (difficult).” (S-5c)
	Lack of medical interpreters	“I knew some hospitals that provided the English interpreters, but I did not know the one with Nepali interpreters. I could not explain my medical condition properly neither in English language nor in the Japanese language. I usually asked my friend to help me visit the hospital. Otherwise, I did not go alone.” (S-6a)	S6. Medical interpreters were not available.	0.683	0.73 (0.55 - 0.97) *	0.70 (0.52 - 0.94) *
		“I could understand the Japanese language, but I could not understand the terminology. There were no medical interpreters.” (S-6b)
	Lack of the hotline services	“My city provided COVID hotline services, however, it was not accessible when needed. Each time I called the center, the call was busy.” (S-7a)	S7. COVID-19 Hotlines were not available when needed.	0.274	0.68 (0.51 - 0.92) *	0.67 (0.49 - 0.92) *
		“Most of the information I got was from the social media. I wish there was a number I could dial and ask, but I didn’t know where to call.” (S-7b)
Cognitive barriers	Unawareness of available services	“In Japan, I did not know where to go if I had some diseases” (COG-1a)	COG1. I didn’t/don't know where to go if I have health problems	0.351	0.44 (0.33 - 0.59) ***	0.49 (0.36 - 0.66) ***
		“Having lived already for three years in Japan, I finally knew about the mental health service hotline available in the Nepali language” (COG-1b)
	Difficulty in trusting healthcare providers	“I was pregnant. My doctor told me that it was safe to take the vaccines, but I had already heard that some doctors refused to administer the vaccines to pregnant women. I did not know whom to trust. I did not want anything to happen to my baby” (COG-2a)	COG2. I don’t know whom to trust because different doctors have different opinions.	0.322	0.66 (0.50 - 0.86) **	0.64 (0.47 - 0.86) **
		“Some scientists and doctors said that the COVID-19 was not real, while other doctors said it was real. Why did doctors have different opinions? Both were doctors. Who should I believe?” (COG-2b)
	Information overload	“There was much information about the preventive measures of COVID-19. We could not follow each and everything, like social distancing. I felt overloaded and I did not want to hear the same thing again and again” (COG-3a)	COG3. Too much information from different sources made confusion.	0.406	0.70 (0.54 - 0.91) **	0.70 (0.53 - 0.93) *
		“All over the world the information-related media were talking about the COVID-19 and it was too much for me to hear the same thing every day. Some used to say the beta virus was dangerous and now they say this delta is dangerous. I think there is no end to COVID-19 because it is just like an influenza virus. There is no need to worry” (COG-3b)
		“I had Covid-19 infection last month. Some said that we could take the vaccine after 14 days; while others said we could take the vaccine after 30 days; and few others said that there was no need to take vaccines for the next two to three months. It was so confusing. Please clarify” (COG-3c)
	Limited awareness of COVID-19 and vaccination	“I didn't know sign in symptoms of COVID-19” (COG-4a)	COG4a. I didn’t/don’t sign and symptoms of COVID-19.	0.211	0.56 (0.43 - 0.73) ***	0.58 (0.44 - 0.78) ***
		“I didn’t know how vaccines work and whether I was liable to be t vaccinated or not.” (COG-4b)	COG4b. I didn’t know how vaccines work and whether I am liable to get vaccinated or not.	0.301
		COVID-19 is a game to reduce the world's population.” (COG-4c)	COG4c. COVID-19 is a game to reduce the world's population.	0.279
Cultural barriers	Language barriers	“I did not know the language” (CUL-1a)	CUL1. I had language problems.	0.372	0.48 (0.36 - 0.63) ***	0.51 (0.38 - 0.70) ***
		“What to say when I called to the clinic or hospital” (Cul-1b)
		“I wanted to go to hospital, but I was not confident enough about my language ability to speak up with doctor” (CUL-1c).
	Communication barriers	“Doctors did not talk clearly about the diseases. They used to say kamosirenai (maybe), machimasyo (let’s wait). Hakkiri iutte hosii na (I wished doctors would tell me clearly)” (CUL-2)	CUL2. Doctors don't tell us clearly about the disease.	0.313	0.56 (0.42 - 0.75) ***	0.55 (0.40 - 0.75) ***
	Self-healing practices	“I waited for self-healing. I had ginger, turmeric, honey, and basil leaves which relieved me a bit for my throat pain. Later my fever was not decreasing so I asked a Nepali senpai (senior) and called the public health Center” (CUL -3a)	CUL3. I waited for self-healing.	0.375	0.70 (0.53 - 0.92) **	0.77 (0.57 - 1.03)
		“I wanted to heal myself at first; and if the disease got severe then I would like to visit the hospital” (CUL-3b)
	Cultural food preferences	“I didn't eat the food at the hospital because I preferred Nepali food. It was difficult to stay at the hospital without good food” (CUL-4a)	CUL4. Hospital/Hokenjo food was not tasty / not preferable.	0.306	0.80 (0.59 - 1.03)	0.79 (0.58 - 1.08)
		“The food from hokenjyo (public health center) was not tasty, so I asked some of my friends to bring food for me (CUL-4b)
		“I used to get sick more in a hospital because I could not eat food at all” (CUL-4c)
		“Hospital/Hokenjo food was not preferable” (CUL-4d)
	Inefficacy of low- dose drug	“I usually bring my medicines from Nepal which work because medicines in Japan don’t work like medicines in Nepal” (Cul-5)	CUL5. Medicines in Japan don't work like medicines in Nepal.	0.224	0.65 (0.47 - 0.90) **	0.67 (0.48 - 0.94) *
	Unfamiliarity with Japanese medical system	“The Japanese medical system was difficult to understand” (Cul-6a)	CUL6. The Japanese medical system is difficult to understand.	0.343	0.51 (0.38 - 0.67) ***	0.52 (0.38 - 0.70) ***
		“In Nepal, we have a culture of natural healing and herbal medicines. Neither there are many health facilities in Nepal nor there is health insurance system. When I came to Japan for the first time, I came to know that there were different departments of health services. We needed to book for services or care provided here which was not a usual practice in our country. There are many papers works…
Psycho-logical barriers	Fear of catching virus	“I feared catching the virus, so I got scared to go to hospitals. I even got fear of catching the virus from clothes of people inside trains” (P-1)	P1. I had fear of catching the virus.	0.626	1.01 (0.77 - 1.31)	1.15 (0.86 - 1.54)
	Fear of losing job	“If I had to go to the hospital then I could not have done my part-time work. I had to leave the job, but I needed money. The staff was also very few. I did not want to leave or lose my job.” (P-2)	P2. I had fear of losing my job.	0.493	0.64 (0.49 - 0.83) **	0.74 (0.56 - 0.99) *
	Fear of discrimination	“I had been hearing news about discrimination at many places and even in other countries. I had heard of threatening and deportation, so I had also fear of discrimination” (P-3a)	P3. I had fear of discrimination.	0.455	0.50 (0.39 - 0.66) ***	0.57 (0.43 - 0.76) ***
		“I could realize the differences in the information provided for Japanese and for migrants in my company. I felt as if my manager did not like to speak to me. I don't know if this was a culture or whatsoever, but I felt discriminated. So, I do not want to share about my health issues” (P-3b)
	Privacy issues	“I did not want to share my information at that time. The time has changed but at that time, I wanted my privacy. People would believe that I got Covid-19 due to my negligence.” (P-4)	P4. I had my privacy concerns.	0.278	0.74 (0.55 - 0.99) *	0.83 (0.60 - 1.13)
	Loneliness	“I stayed for 15 days without my baby and my husband, and I was lonely.” (P-5a)	P5. I was lonely or afraid of being lonely at the hospital.	0.313	0.69 (0.52 - 0.92) *	0.74 (0.55 - 1.01)
		“I did not want to go to the hospital because my family could not stay with me together” (P-5b)
	Depression due to loss in income	““My income has been reduced. My company gives me less money. I needed money for my gakko (school). I was depressed” (P-6)	P6. I was/am depressed due to a loss in income.	0.412	0.71 (0.55 - 0.93) *	0.89 (0.67 - 1.20)
Legal barriers	Problems with legal documentation	“I was a migrant to this city, and I had my documents in another prefecture. My company refused to give me the shot. It was not even possible at that time to go back to my prefecture to get the documents” (L-1)	L1. I had problems due to legal documentation.	0.247	0.60 (0.44 - 0.82) **	0.61 (0.44 - 0.86) **
Facilitators	Free COVID-19 medical care	“I was infected with COVID 19 and was admitted to hospital. At first, I was worried about medical expenses, but I was not required to pay the bills except for my expenses like drinks and snacks. Free medical care became a blessing for me in Japan” (FA-1a)	FA1. COVID-19 free medical service from the government was helpful.	0.739	1.33 (0.99 - 1.79)	1.22 (0.88 - 1.68)
		“My husband lost his job when he got admitted to hospital. We were not in a position to manage hospital expenditures. Although we had to pay for transportation to the hospital, we did not pay for hospital expenditure. At least, free healthcare service became helpful” (FA-1b)
		“Some medical workers came at my home, they checked-up and gave medicines for free” (FA-1c)
	Health insurance	“Actually, my friend told me about the health insurance policy. He made me realize that I had also paid for health insurance, so I need to pay 30% if I go for a checkup. At that time, I had problems with the tingling sensation in my hands. I had to do different nerves tests. I thought that the bills of those procedures would be too expensive, but it was 3 or 4 thousand in total, which I could aff…	FA2. Having national health insurance was helpful.	0.707	1.17 (0.88 - 1.57)	1.20 (0.88 - 1.63)
		“I have insurance from the company. Health insurance is helpful for us, so I encourage everyone to pay insurance premium monthly” (FA-2b)
	Medical interpreters	“I know a clinic where there is a Nepali sister as an interpreter. I used to go that clinic. I also got my vaccination in that clinic with help of her” (FA-3a)	FA3. Medical interpreters were available.	0.279	0.97 (0.73 - 1.30)	1.05 (0.77 - 1.43)
		“Mother of my friend was recently diagnosed with lung cancer. The doctor had requested to find an interpreter. I helped her family in searching clinics that had Nepali medical interpreters, but when we could not find, the hospital arranged it by themselves” (FA-3b)
	Mutual aid	“When I became COVID-19 positive, I had to stay in quarantine. I live alone but my friends helped me by bringing foods and medicines for me” (FA-4a)	FA4. Friends/family/school/company/ helped me get food/medicines/money.	0.622	1.29 (0.99 - 1.67)	1.32 (1.00 - 1.74)
		“I was mentally depressed because I could not pay school fees due to loss in income. The aid given was not sufficient. Gakko (school) also gave some flexibilities by providing scholarship, and my friends helped me by lending some money for my livelihood” (FA-4b)
		“When I was in quarantine, my company helped me giving COVID test kits, even food and other materials” (FA-4c)
	Telehealth services	“I saw information on Facebook about some Nepali doctors providing free medical consultations for those infected with COVID-19 and taking care of their health at home. I called the number, and it was free. The doctor consulted me on zoom. I was advised to take medicines from drugstores he prescribed” (FA-5a)	FA5. Telehealth services with doctors was helpful	0.303	1.05 (0.79 - 1.39)	1.00 (0.73 - 1.36)
		“When my whole family in Nepal was in isolation due to COVID-19 infection, they could access Nepali doctors and nurses online. Later when I got COVID-19 here in Japan, I consulted with one of the same doctors online. It was helpful for me in Japan too” (FA-5b)
		“I called a public health doctor in the US using Viber app” (FA-5c)
	Health information from Nepali nurses/doctors and health volunteers	“There was a zoom seminar about COVID-19 information from a group of medical personnel living in Japan, broadcasted live on many Nepali online news channels of Japan. That seminar was helpful to understand preventive measures, self-management at home for mild symptoms, and about vaccination” (FA-6a)	FA6. Health information from Nepali nurses/doctors/health volunteers was helpful.	0.612	1.27 (0.97 - 1.66)	1.36 (1.01 - 1.82) *
		“People were saying that vaccine is harmful, it is just being tested in human. It was a confusing state for me who do not understand what was going on. However, I trusted a Nepali nurse who was living in Japan and was sharing COVID-19 related informative videos daily on her social media, that was helpful to me” (FA-6b)
		“Nepali Association volunteers helped me get my vaccination shot” (FA-6c)
		It was difficult to call the health center. The line was too busy. I could not make it. So, I called a Nepali nurse in Japan and took drug stores medicines that she recommended” (FA-6d)
OR = Odds Ratio (obtained from logistic regression analysis), CI = Confidence Interval, Adjusted OR2 = odds ratio of disagreement compared to the agreement upon respective barriers or facilitators obtained after adjusting the sociodemographic characteristics of the survey participants, *=p-value<0.05, **=p-value<0.01, ***=p-value<0.001
